# Supplementary material
Source: ML conference proceedings conference paper supplement (https://openaccess.thecvf.com/content/CVPR2023/html/Tang_FLAG3D_A_3D_CVPR_2023_paper.html)
Supplement: Supplementary file 1 [file Tang_FLAG3D_A_3D_CVPR_2023_supplemental.pdf]

# Supplementary Material for “FLAG3D: A 3D Fitness Activity Dataset with Language Instruction”

Yansong Tang<sup>\*,†,1</sup>, Jinpeng Liu<sup>\*,1</sup>, Aoyang Liu<sup>\*,1</sup>,  
Bin Yang<sup>1</sup>, Wenxun Dai<sup>1</sup>, Yongming Rao<sup>2</sup>, Jiwen Lu<sup>◊,2</sup>, Jie Zhou<sup>2</sup>, Xiu Li<sup>◊,1</sup>

<sup>\*</sup>equal contribution, <sup>†</sup>project lead, <sup>◊</sup>corresponding authors

{<sup>1</sup>Shenzhen International Graduate School, <sup>2</sup>Department of Automation}, Tsinghua University

## 1. Comparison With More Datasets

Owing to the page limitation, we did not display numerous relevant datasets, especially for some image-based datasets. Thus, in this section, we provide a more comprehensive comparison for FLAG3D in Table 1.

## 2. FLAG3D Dataset

Figure 4 displays more examples from our dataset. From left to right, the MoCap data, rendered RGB image, and RGB image with SMPL fitting are shown, respectively. From top to bottom, we demonstrate several frames from FLAG3D Dataset. They represent action “Svend Press”, “Standing Straight-arm Chest Press With Resistance Band”, “Jumping Jacks”, “Kneeling Left Knee Lift”, “Left-side Knee Raise And Abdominal Muscles Contract” and “Prone Press Up With Torso Rotation” respectively.

## 3. Labeling System

There are 60 kinds of fitness actions in FLAG3D. Selected activities exercise most parts of our body, including the chest, back, shoulder, arm, neck, abdomen, waist, hip, and leg. For example, there are six kinds of actions: “Svend Press”, “Keeling Push-ups”, “Standing Straight-arm Chest Press With Resistance Band”, “Small Dumbbell Floor Flies”, “Chest Fly”, and “Push-ups that exercise chest muscles”. As shown in Table 4, we label each action from A001 to A060.

## 4. Additional Details of Data Collection

From right to left in Figure 1, each part of the bottom branch is point cloud data, rigid body constraints data based on the point cloud data, skeleton data, and skin data. This shows the whole data process at the software level in the MoCap system. The point cloud data and the skeleton data are involved in our dataset to implement various experiments. The rigid body constraints data are the intermediate products to produce the skeleton data. And the skin data

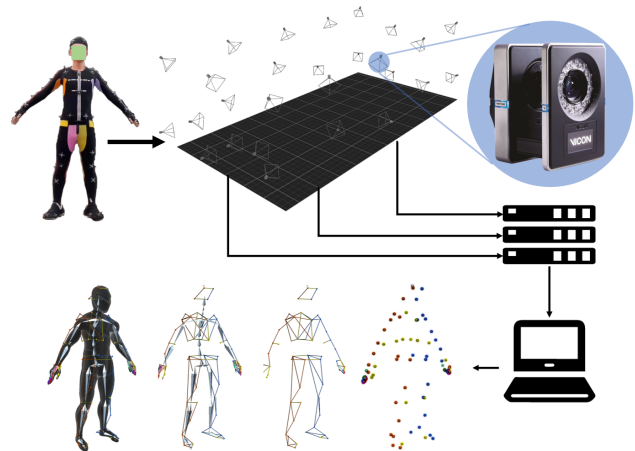

Figure 1. An overview of the MoCap system. From right to left, each part of the bottom branch is point cloud data, rigid body constraints data based on point cloud data, skeleton data, and skin data. When volunteers perform actions in the motion capture field, infrared cameras transmit the high frame rate IR grayscale images to the data switch. At the same time, monitors check whether the data is captured properly by the dynamic data displayed on the device. The point cloud data and the skeleton data are involved in our dataset to implement various experiments. The rigid body constraints data were the intermediate products to produce the skeleton data. And the skin data displayed a real-time capture effect to help us track possible problems in the capture process.

displays a real-time capture effect to help us track possible problems in the capture process.

### 4.1. MoCap Marker

Volunteers wear special MoCap apparel. MoCap costumes have dense markers to ensure that all parts of the body are accurately recorded. Marker numbers for body parts are listed in Table 2. Totally, there are 77 markers on the volunteer body to ensure that our dataset could provide accurate 3D skeleton information.

Table 1. Comparisons of FLAG3D with the various datasets. *Type* represents the dataset consists of images or videos. Other abbreviations are the same as body part.

| Dataset                  | Subjs   | Cats | Seqs | Frames | Type  | LA | K3D | SMPL | Resource      | Task        |
|--------------------------|---------|------|------|--------|-------|----|-----|------|---------------|-------------|
| UCF101 [22]              | -       | 101  | 13K  | >2M    | Video | ×  | ×   | ×    | Nat.          | HAR         |
| Penn Action [29]         | -       | 15   | 2326 | -      | Video | ×  | ×   | ×    | Nat.          | HAR,HPR     |
| MPII [3]                 | -       | 410  | -    | 24K    | Image | ×  | ✓   | -    | Nat.          | HAR,HPE     |
| COCO [14]                | -       | -    | -    | 104k   | Image | ×  | ×   | ×    | Nat.          | HPE         |
| AMASS [17]               | >300    | -    | 11K  | 16M    | Video | ×  | ✓   | ✓    | Lab.          | HMR         |
| AGORA [19]               | >350    | -    | -    | 17K    | Image | ×  | ×   | ✓    | Syn.          | HMR         |
| SURREAL [25]             | 145     | -    | 2K   | 6M     | Video | ×  | ✓   | ✓    | Nat.+Syn.     | HMR         |
| HUMBI [28]               | >700    | -    | -    | 26M    | Video | ×  | ✓   | ✓    | Lab.          | HMR         |
| THuman [31]              | 200     | -    | -    | 28K    | Image | ×  | ✓   | ✓    | Syn.          | HMR         |
| PoseTrack [2]            | -       | -    | 550  | 66K    | Video | ×  | ×   | ×    | Nat.          | HPE         |
| Human3.6M [9]            | 11      | 17   | 839  | 3.6M   | Video | ×  | ✓   | -    | Lab           | HAR,HPE,HMR |
| CMU Panoptic [11]        | 8       | 5    | 65   | 594K   | Video | ×  | ✓   | -    | Lab           | HPE         |
| MPI-INF-3DHP [18]        | 8       | 8    | -    | >1.3M  | Video | ×  | ✓   | -    | Lab+Nat.      | HPE,HMR     |
| 3DPW [27]                | 7       | -    | 60   | 51k    | Video | ×  | ×   | ✓    | Nat.          | HMR         |
| ZJU-MoCap [20]           | 6       | 6    | 9    | >1k    | Video | ×  | ✓   | ✓    | Lab           | HAR,HMR     |
| NTU RGB+D 120 [15]       | 106     | 120  | 114k | -      | Video | ×  | ✓   | -    | Lab           | HAR,HAG     |
| HuMMan [4]               | 1000    | 500  | 400K | 60M    | Video | ×  | ✓   | ✓    | Lab           | HAR,HMR     |
| HumanML3D [7]            | -       | -    | 14K  | -      | -     | ✓  | ✓   | ✓    | Lab           | HAG         |
| KIT Motion Language [21] | 111     | -    | 3911 | -      | -     | ✓  | ✓   | -    | Lab           | HAG         |
| HumanAct12 [8]           | 12      | 12   | 1191 | 90K    | Video | ×  | ×   | ✓    | Lab           | HAG         |
| UESTC [10]               | 118     | 40   | 25K  | > 5M   | Video | ×  | ✓   | -    | Lab           | HAR,HAG     |
| Fit3D [6]                | 13      | 37   | -    | > 3M   | Video | ×  | ✓   | ✓    | Lab           | HPE,RAC     |
| EC3D [30]                | 4       | 3    | 362  | -      | Video | ×  | ✓   | -    | Lab           | HAR         |
| Yoga-82 [26]             | -       | 82   | -    | 29K    | Image | ×  | ×   | ×    | Nat.          | HAR,HPE     |
| <b>FLAG3D (Ours)</b>     | 10+10+4 | 60   | 180K | 20M    | Video | ✓  | ✓   | ✓    | Lab+Syn.+Nat. | HAR,HMR,HAG |

## 4.2. Hardware

We use the VICON [1] optical motion capture system to capture the character’s motion, which consists of 24 VICON V16 cameras. Our system works with Vicon’s powerful software platforms to enable a light touch while we are running a capture session. This MoCap system is highly robust, it can perform bump detection while capturing motions. Bump detection means that the system knows when a camera needs recalibrating and auto-heals without operator input. MoCap system’s technology IP advances allow Vantage+ to hit resolution and speed sweet spots. Specific parameters of the camera are shown in Table 3.

Table 2. Marker numbers for body parts. In order to capture fine-grained human movements, we add sufficient markers on all parts of the human body.

| Body Parts   | Markers   | Body Parts      | Markers |
|--------------|-----------|-----------------|---------|
| Head         | 5         | Finger          | 10 × 2  |
| Waist        | 6         | Thorax and back | 12      |
| Arm          | 4 × 2     | Wrist and Palm  | 4 × 2   |
| Leg          | 4 × 2     | Ankle and Foot  | 5 × 2   |
| <b>Total</b> | <b>77</b> |                 |         |

Table 3. Hardware Parameters. Cameras used in this system have a maximum resolution of 4096×4096. It is capable of 120fps while maintaining maximum resolution sampling.

|                               | Vantage+ Normal Mode |
|-------------------------------|----------------------|
| Model                         | V16                  |
| Resolution (MP)               | 16                   |
| Max Frame Rate (Hz)           | 120 @ 16MP           |
| Max Frame Rate (Hz)           | 2000                 |
| On-Board Marker Processing    | Yes                  |
| Standard Lens                 | 18 mm                |
| Wide Lens                     | 12.5 mm              |
| Minimum Standard FOV (H x V)° | 54.7 × 54.7          |
| Minimum Wide FOV (H x V)°     | 76.4 × 76.4          |
| Camera Latency                | 8.3 ms               |
| Strobe                        | IR                   |
| Shutter Type                  | Global               |
| Connection Type               | Cat5e / RJ45         |
| Power                         | PoE+                 |
| Max Power Consumption         | 24W                  |
| Dimensions (mm) (H x W x D)   | 166.2 × 125 × 134.1  |
| Weight (kg)                   | 1.6                  |
| Updateable Firmware           | Yes                  |

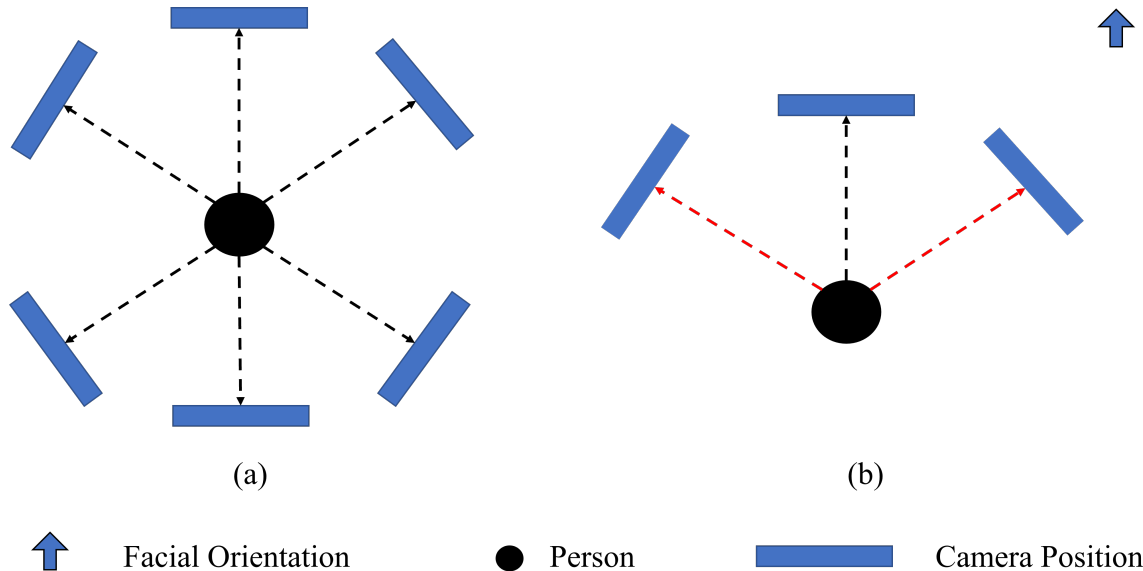

Figure 2. Camera Position Setting. In rendering software, the camera positions are settled as shown in figure (a). The avatar is surrounded by six cameras in a circle to allow for multi-angle video. In the nature scene, we selected two camera positions as shown in figure (b). The red dotted line represents a random selection of one of these perspectives.

### 4.3. Camera Position

In Figure 2, we show the camera settings for rendered videos and natural videos. We put 6 cameras around the avatars to obtain the multi-view videos and Figure 2(a) displays the arrangement. And for natural videos, we require volunteers to shoot their videos from two views. One is the front view and another is any front side view as shown in Figure 2(b). The red dotted line represents we only need one camera in the side view.

## 5. Details of Experiments

### 5.1. Action Recognition

For in-domain experiments, we employ an Adam [12] optimizer for 30 epochs using a cosine decay learning rate. A batch size of 64 is used. Specifically, the initial learning rate and weight decay are set to 0.1 and  $5e-4$ , respectively. For out-domain experiments, we use a larger batch size of 128. The learning rate, weight decay, optimizer and scheduler are the same as that for in-domain experiments. Unless otherwise mentioned, for all models, we sample 500 frames uniformly from the entire clip and only adopt the joint stream. We take the 10-clip testing results to report our Top-1 accuracy.

### 5.2. Human Mesh Recovery

For the optimization process to obtain the SMPL mesh, the loss weights  $\lambda_1, \lambda_2, \lambda_3, \lambda_4$  in the objective function are  $1, 5 \times 10^{-3}, 1, 1 \times 10^{-3}$  respectively. We verify the SMPL

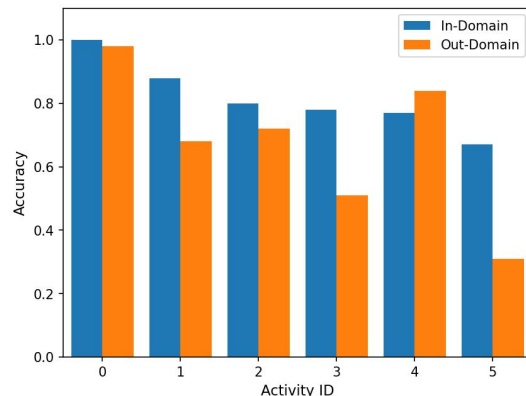

Figure 3. Per-class performances of 2s-AGCN under the in-domain and out-domain scenarios. 0: Wrist Joint Warm-up; 1: Shoulder Bridge; 2: Prone Press Up With Torso Rotation; 3: Lying Shoulder Joint Downward Round; 4: Kneeling Right Arm Raise; 5: Bent-over Dumbbell Tricep Extension.

parameter registration process using the MPJPE and PAMPJPE and their values are 56.09 and 27.02 respectively.

We used the pre-trained HR-Net [23] backbone to fine-tune the ROMP method on FLAG3D Dataset. We employ an Adam [12] optimizer. An initial learning rate of  $5e-5$  and a batch size of 64 are used. We use the 3D SMPL joints [16], 2D COCO-17 keypoints [14] obtained from HR-Net [23] method and shape parameters to supervise the training.

## 6. Analysis of Evaluation

As shown in Figure 3, the Top-1 accuracy of 2s-AGCN on “*Bent-over Dumbbell Tricep Extension*” and “*Lying Shoulder Joint Downward Round*” are inferior compared with other categories, the most confusing classes for “*Bent-over Dumbbell Tricep Extension*” are “*Bent-over W-shape Stretch*”, “*Bent-over Y-shape Stretch*” and “*Right-side Bent-over Tricep Extension With Resistance Band*”.

A qualitative comparison of different methods for human mesh recovery on FLAG3D is shown in Figure 5. As we can see in this picture when the human is lying or kneeling the result will be dissatisfactory. We have mentioned this phenomenon in the body part. In this section, we will explore more about it. The first question is, are these results caused by the reason that the person is too tiny in the picture to recognize or the reason that the action is too complex to recover an accurate pose? The answer is both but the latter more matters. We crop the original picture into 1/2 and 1/4 to make a larger character in the image and then evaluate methods on it. In Figure 5, we showed the inference results from different methods on three cropped pictures. The results indicate that for the original image with the tiny person the challenge lies in recognizing the right person in the picture but for the cropped image because the person is no longer tiny, some algorithms could recognize the person in the right location which is an improvement as we find algorithm couldn’t recognize the person in many cases with default threshold 0.2 and we often have to reduce it to let the algorithm work but the side effect is the method will often misrecognize the background as a person or recognize the person which is not in the proper location(see examples in Figure 5 row 4). And for the cropped pictures, the challenge is to understand the right posture in this case. But there is still a large distance to the acceptable result. From Figure 5, BEV [24] and ROMP [5] indeed estimate the lying posture of one body but can’t infer the poses of the limbs accurately. Even if the algorithm could recognize the right person in the right location, it is also very challenging to recover some complex activities.

The second question is, What kind of action is difficult to recover? So we explore the effects of different movements on human mesh recovery based on FLAG3D. We compare the results trying to estimate three activities in Figure 5. To control the irrelevant variable, we choose three actions from the same person, same scene and same view. From left to right, the Figure 5 displays the results from standing to lying. We find as people’s center of gravity dropping, the task is more challenging because the visible part of the whole body is less and less. From the visual results of the experiment, standing is easy to recover pose than kneeling and kneeling is easy than lying. The character’s size in column 2 and column 3 is approximately the same but the methods’ performance on these are distinct, which confirms that

complex activities are the main challenge for this task.

Another reason that these methods can’t deal with these cases is that they never learn about them because past datasets for training hardly include these actions about fitting. So our dataset could serve as a difficult and long-term benchmark for human mesh recovery task.

## References

- [1] Vicon. <https://www.vicon.com/hardware/cameras>. 2
- [2] Mykhaylo Andriluka, Umar Iqbal, Eldar Insafutdinov, Leonid Pishchulin, Anton Milan, Juergen Gall, and Bernt Schiele. Posetrack: A benchmark for human pose estimation and tracking. In *CVPR*, pages 5167–5176, 2018. 2
- [3] Mykhaylo Andriluka, Leonid Pishchulin, Peter Gehler, and Bernt Schiele. 2d human pose estimation: New benchmark and state of the art analysis. In *CVPR*, 2014. 2
- [4] Zhongang Cai, Daxuan Ren, Ailing Zeng, Zhengyu Lin, Tao Yu, Wenjia Wang, Xiangyu Fan, Yang Gao, Yifan Yu, Liang Pan, et al. Humman: Multi-modal 4d human dataset for versatile sensing and modeling. *arXiv preprint arXiv:2204.13686*, 2022. 2
- [5] Taosha Fan, Kalyan Vasudev Alwala, Donglai Xiang, Weipeng Xu, Todd Murphey, and Mustafa Mukadam. Revitalizing optimization for 3d human pose and shape estimation: a sparse constrained formulation. In *ICCV*, pages 11457–11466, 2021. 4, 7, 8
- [6] Mihai Fieraru, Mihai Zanfir, Silviu Cristian Pirlea, Vlad Olaru, and Cristian Sminchisescu. Aifit: Automatic 3d human-interpretable feedback models for fitness training. In *CVPR*, pages 9919–9928, 2021. 2
- [7] Chuan Guo, Shihao Zou, Xinxin Zuo, Sen Wang, Wei Ji, Xingyu Li, and Li Cheng. Generating diverse and natural 3d human motions from text. In *CVPR*, pages 5152–5161, 2022. 2
- [8] Chuan Guo, Xinxin Zuo, Sen Wang, Shihao Zou, Qingyao Sun, Annan Deng, Minglun Gong, and Li Cheng. Action2motion: Conditioned generation of 3d human motions. In *ACM MM*, pages 2021–2029, 2020. 2
- [9] Catalin Ionescu, Dragos Papava, Vlad Olaru, and Cristian Sminchisescu. Human3.6m: Large scale datasets and predictive methods for 3d human sensing in natural environments. *TPAMI*, 36(7):1325–1339, 2013. 2
- [10] Yanli Ji, Feixiang Xu, Yang Yang, Fumin Shen, Heng Tao Shen, and Wei-Shi Zheng. A large-scale varying-view rgb-d action dataset for arbitrary-view human action recognition. *arXiv preprint arXiv:1904.10681*, 2019. 2
- [11] Hanbyul Joo, Hao Liu, Lei Tan, Lin Gui, Bart Nabbe, Iain Matthews, Takeo Kanade, Shohei Nobuhara, and Yaser Sheikh. Panoptic studio: A massively multiview system for social motion capture. In *ICCV*, pages 3334–3342, 2015. 2
- [12] Diederik P Kingma and Jimmy Ba. Adam: A method for stochastic optimization. *arXiv preprint arXiv:1412.6980*, 2014. 3
- [13] Muhammed Kocabas, Nikos Athanasiou, and Michael J Black. Vibe: Video inference for human body pose and shape estimation. In *CVPR*, pages 5253–5263, 2020. 7, 8



Table 4. Action comparison table of FLAG3D. In total, there are 60 kinds of actions. Selected activities exercise most parts of the body, including the chest, back, shoulder, arm, neck, abdomen, waist, hip, and leg.

| <b>Chest</b>    |                                       | <b>Abdomen</b>    |                                      |
|-----------------|---------------------------------------|-------------------|--------------------------------------|
| A001            | Svend Press                           | A030              | Lying Alternate Upper-half Leg Raise |
| A002            | Kneeling Push-ups                     | A031              | Half Roll Back                       |
| A003            | Standing Straight-arm Chest Press     | A032              | Kneeling Right-side Torso Twist      |
|                 | With Resistance Band                  | A033              | Left-side Knee Raise And             |
| A004            | Small Dumbbell Floor Flies            |                   | Abdominal Muscles Contract           |
| A005            | Chest Fly                             | A034              | Kneeling Right Leg Backward Stretch  |
| A006            | Push-ups                              | A035              | Kneeling Right Arm Raise             |
| <b>Back</b>     |                                       | <b>Waist</b>      |                                      |
| A007            | Bent-over W-shape Stretch             | A036              | Shoulder Bridge                      |
| A008            | Bent-over Y-shape Stretch             | A037              | Prone Press-ups                      |
| A009            | Bent-over A-shape Stretch             | A038              | Bent-over Torso Rotation             |
| A010            | Squat With Arm Lift                   | A039              | Lying Arm Pull                       |
| A011            | Breaststroke Arm Pull                 | A040              | Prone Press Up With Torso Rotation   |
| A012            | Prone Y-shape Stretch                 | A041              | Breaststroke Push-ups                |
|                 |                                       | A042              | Sit-ups                              |
| <b>Shoulder</b> |                                       | <b>Hip</b>        |                                      |
| A013            | Lateral Raise Forward Circles         | A043              | Side-lying Left Leg Forward Raise    |
| A014            | Lateral Raise Backward Circles        | A044              | Right Leg Reverse Lunge              |
| A015            | Lying Shoulder Joint Upward Round     | A045              | Kneeling Left Knee Lift              |
| A016            | Lying Shoulder Joint Downward Round   | A046              | Alternate Reverse Lunge              |
| A017            | Bare-handed Full Lateral Raise        | A047              | Side-lying Right Leg Backward Kick   |
| A018            | Bare-handed Cuban Press               | A048              | Left Leg Lunge With Knee Lift        |
| A019            | Fortune Cat                           | A049              | Sumo Squat                           |
| <b>Arm</b>      |                                       | <b>Leg</b>        |                                      |
| A020            | Dumbbell Curls                        | A050              | Straight Leg Calf Raise              |
| A021            | Alternate Dumbbell Curls              | A051              | Squat Jump                           |
| A022            | Right-side Kettlebell Bent-over Row   | A052              | Squat With Alternate Knee Lift       |
| A023            | Wrist Joint Warm-up                   | A053              | Standing Alternate Butt Kick         |
| A024            | Right-side Bent-over Tricep Extension | A054              | Knee Warm-up                         |
|                 | With Resistance Band                  |                   |                                      |
| A025            | Bent-over Dumbbell Tricep Extension   |                   |                                      |
| <b>Neck</b>     |                                       | <b>Whole body</b> |                                      |
| A026            | Nod And Raise Head                    | A055              | Butt Kicks                           |
| A027            | Two-way Head Turn                     | A056              | Jump Left and Right                  |
| A028            | Shrug And Sink The Shoulders          | A057              | Jumping Jacks                        |
| A029            | Four-way Nod Head                     | A058              | High Knee                            |
|                 |                                       | A059              | Clap Jacks                           |
|                 |                                       | A060              | Run In Place With Arm Swing          |

- [14] Tsung-Yi Lin, Michael Maire, Serge Belongie, James Hays, Pietro Perona, Deva Ramanan, Piotr Dollár, and C Lawrence Zitnick. Microsoft coco: Common objects in context. In *ECCV*, pages 740–755. Springer, 2014. 2, 3
- [15] Jun Liu, Amir Shahroudy, Mauricio Perez, Gang Wang, Ling-Yu Duan, and Alex C Kot. Ntu rgb+ d 120: A large-scale benchmark for 3d human activity understanding. *TPAMI*, 42(10):2684–2701, 2019. 2
- [16] Matthew Loper, Naureen Mahmood, Javier Romero, Gerard Pons-Moll, and Michael J Black. SMPL: A skinned multi-person linear model. *TOG*, 34(6):1–16, 2015. 3
- [17] Naureen Mahmood, Nima Ghorbani, Nikolaus F Troje, Gerard Pons-Moll, and Michael J Black. Amass: Archive of motion capture as surface shapes. In *ICCV*, pages 5442–5451, 2019. 2
- [18] Dushyant Mehta, Helge Rhodin, Dan Casas, Pascal Fua, Oleksandr Sotnychenko, Weipeng Xu, and Christian Theobalt. Monocular 3d human pose estimation in the wild using improved cnn supervision. In *3DV*, pages 506–516, 2017. 2

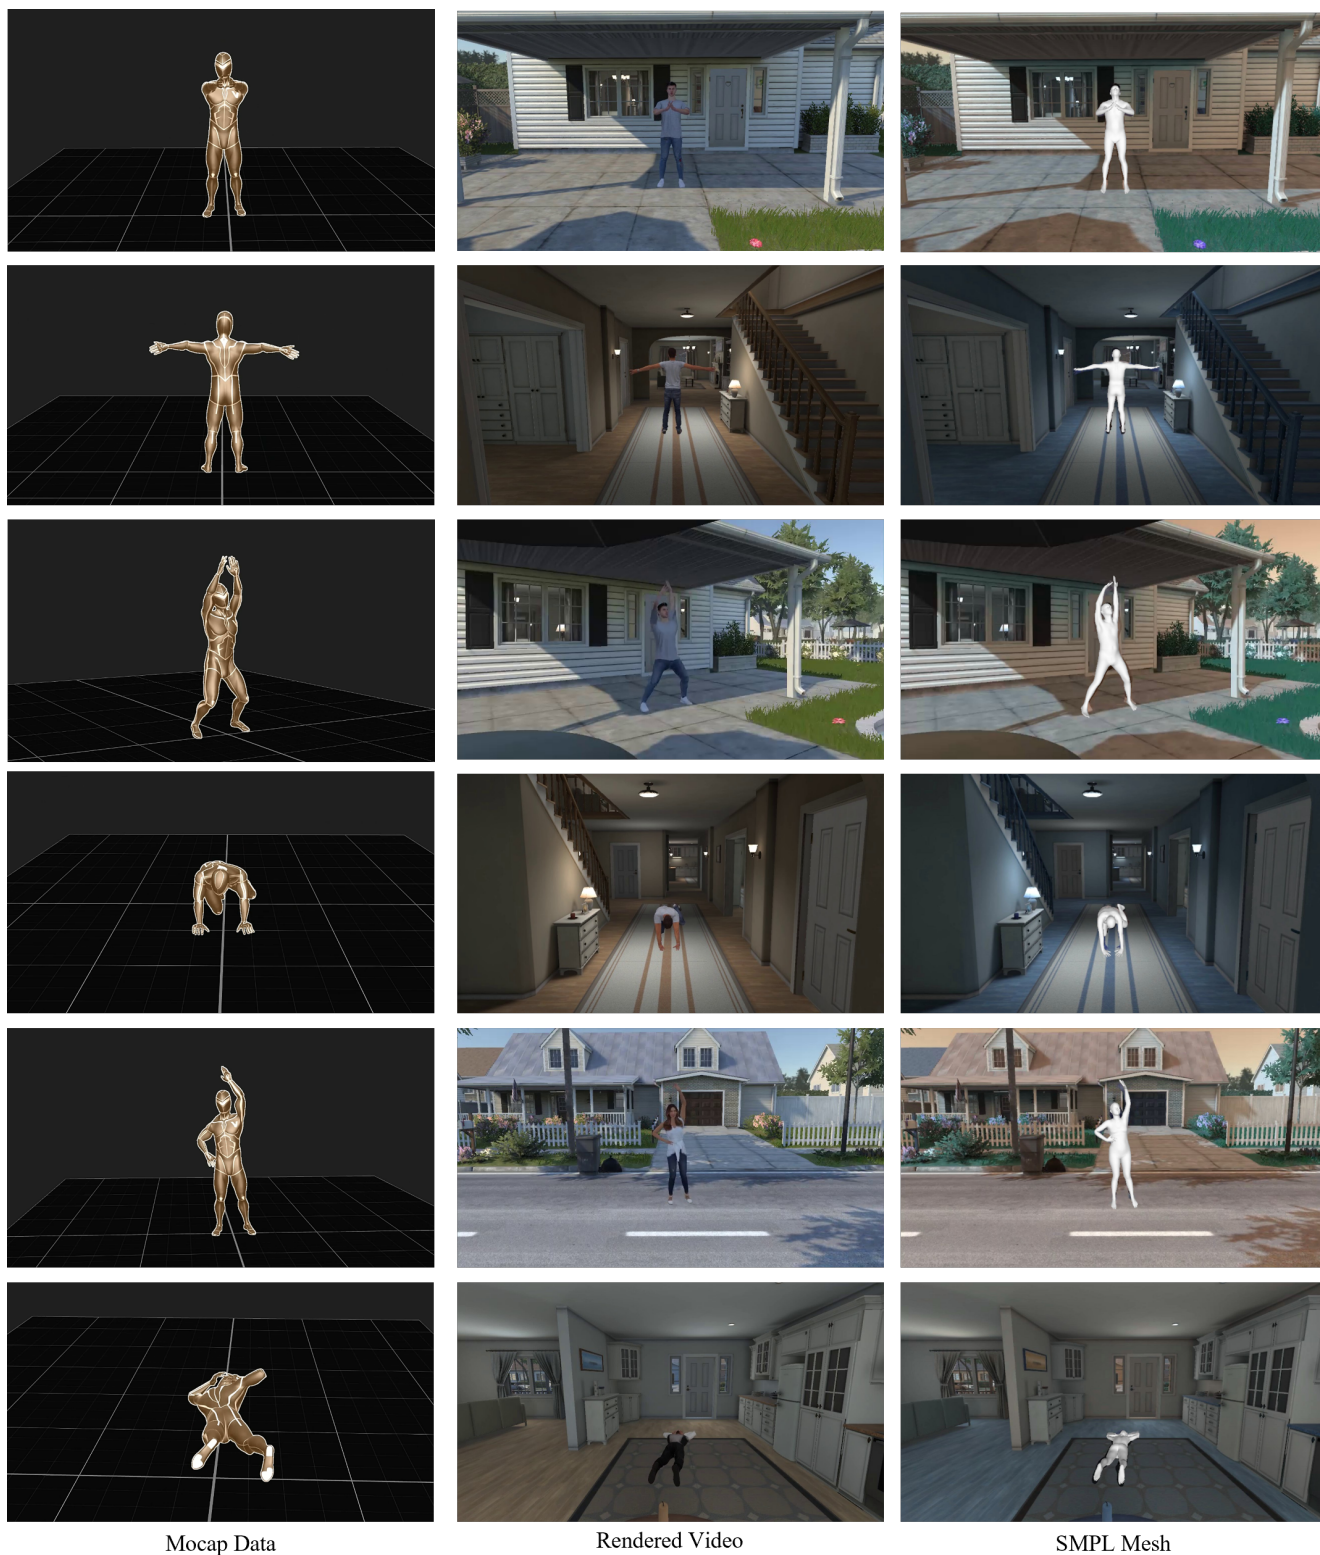

Mocap Data

Rendered Video

SMPL Mesh

Figure 4. Several frames from FLAG3D Dataset. From left to right we display the MoCap data, Original Rendered RGB Videos, and Rendered RGB Videos with SMPL Mesh fitting results.

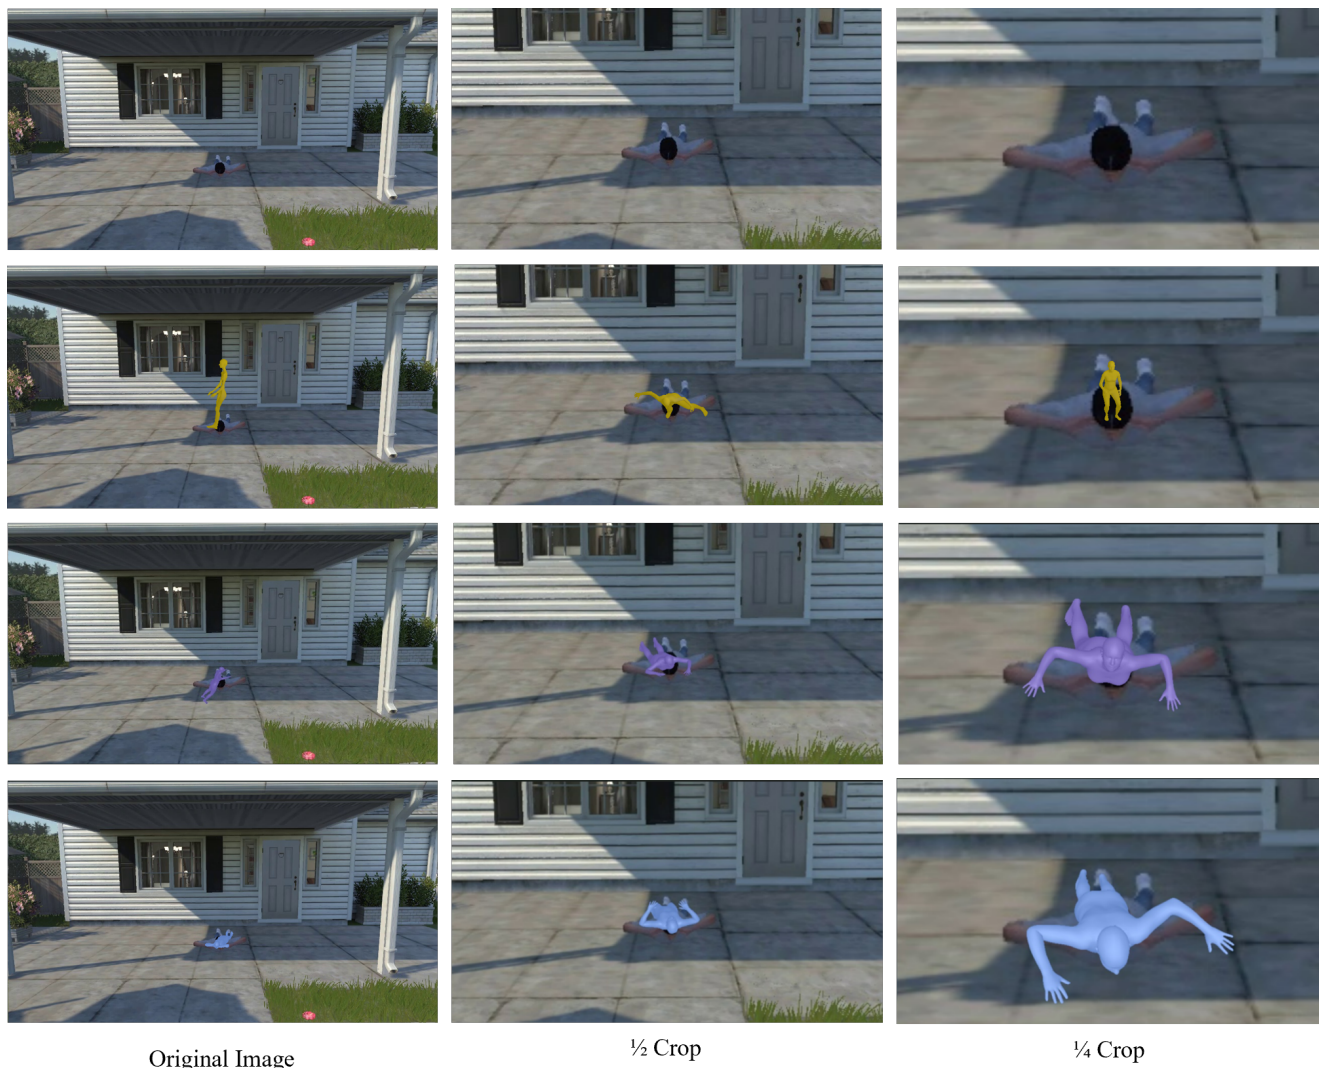

Figure 5. Results from different methods on three cropped pictures. From top to bottom: Original Picture(row 1), VIBE [13](row 2), ROMP [5](row 3), BEV [24] (row 4). From left to right: Original Image, Cropped Image 1(down to a half of the original), Cropped Image 2(down to 1/4 of the original).

- [19] Priyanka Patel, Chun-Hao P Huang, Joachim Tesch, David T Hoffmann, Shashank Tripathi, and Michael J Black. AGORA: Avatars in geography optimized for regression analysis. In *CVPR*, pages 13468–13478, 2021. 2
- [20] Sida Peng, Yuanqing Zhang, Yinghao Xu, Qianqian Wang, Qing Shuai, Hujun Bao, and Xiaowei Zhou. Neural body: Implicit neural representations with structured latent codes for novel view synthesis of dynamic humans. In *CVPR*, pages 9054–9063, 2021. 2
- [21] Matthias Plappert, Christian Mandery, and Tamim Asfour. The kit motion-language dataset. *Big data*, 4(4):236–252, 2016. 2
- [22] Khurram Soomro, Amir Roshan Zamir, and Mubarak Shah. Ucf101: A dataset of 101 human actions classes from videos in the wild. *arXiv preprint arXiv:1212.0402*, 2012. 2
- [23] Ke Sun, Bin Xiao, Dong Liu, and Jingdong Wang. Deep high-resolution representation learning for human pose estimation. In *CVPR*, pages 5693–5703, 2019. 3
- [24] Yu Sun, Wu Liu, Qian Bao, Yili Fu, Tao Mei, and Michael J Black. Putting people in their place: Monocular regression of 3d people in depth. In *CVPR*, pages 13243–13252, 2022. 4, 7, 8
- [25] Gul Varol, Javier Romero, Xavier Martin, Naureen Mahmood, Michael J Black, Ivan Laptev, and Cordelia Schmid. Learning from synthetic humans. In *CVPR*, pages 109–117, 2017. 2
- [26] Manisha Verma, Sudhakar Kumawat, Yuta Nakashima, and Shanmuganathan Raman. Yoga-82: a new dataset for fine-grained classification of human poses. In *CVPRW*, pages 1038–1039, 2020. 2



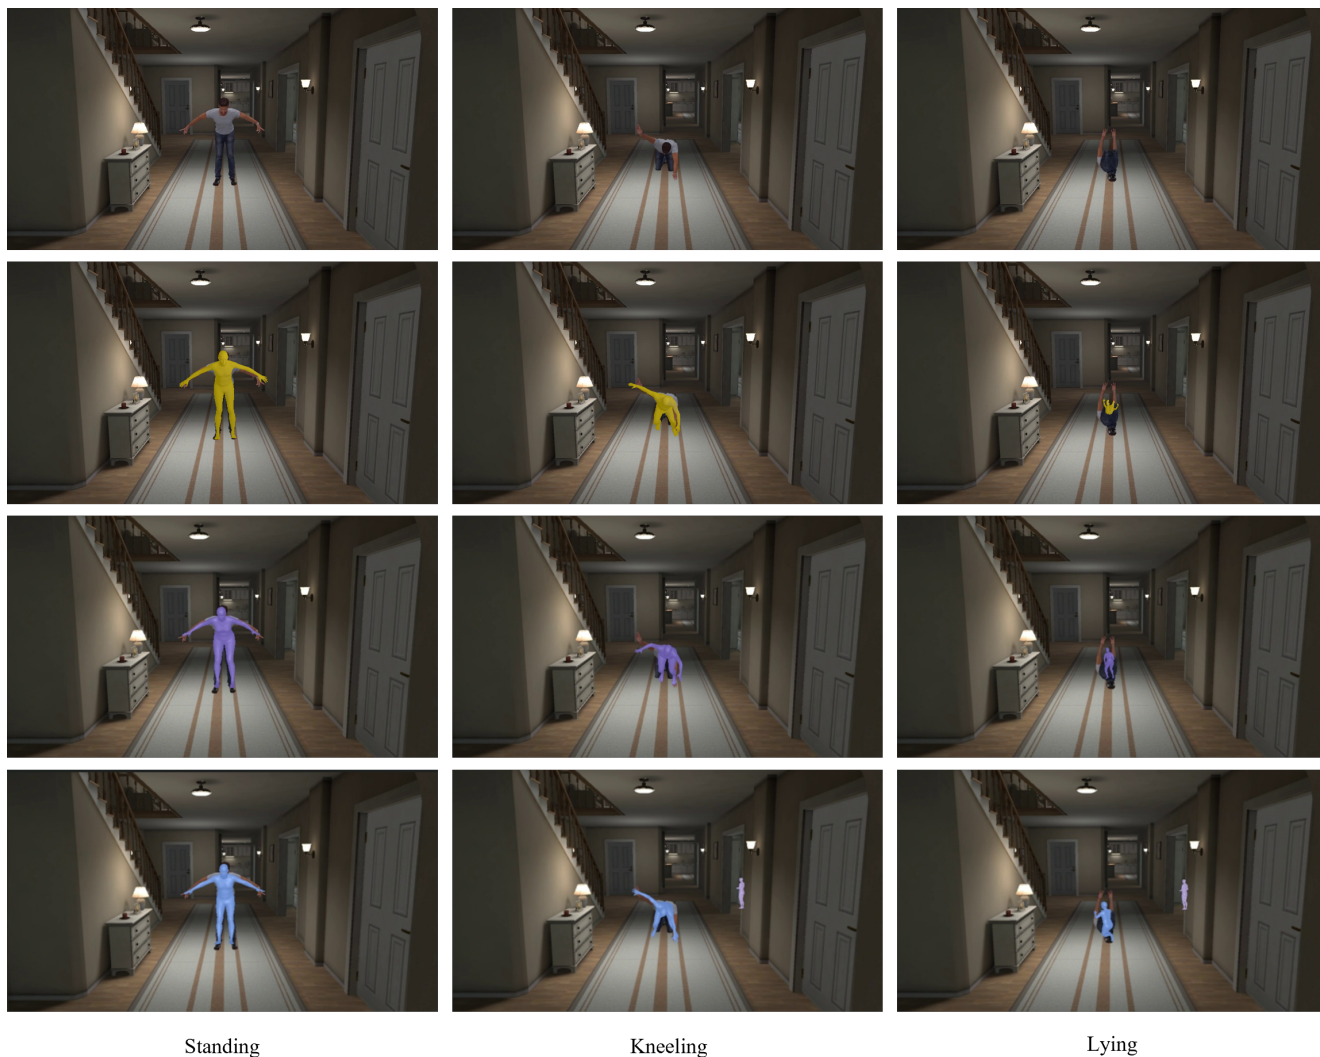

Figure 6. From left to right the activities are “*Bent-over W-shape Stretch*”, “*Kneeling Right Arm Raise*” and “*Lying Shoulder Joint Upward Round*” respectively. For actions in column 1, each method could estimate the shape and pose properly. For actions in column 2, there are some biases for recovering the posture. And for actions in column 3, they all can’t handle situations. From top to bottom: Original Picture (row 1), VIBE [13] (row 2), ROMP [5] (row 3), BEV [24] (row 4).

- [27] Timo von Marcard, Roberto Henschel, Michael J Black, Bodo Rosenhahn, and Gerard Pons-Moll. Recovering accurate 3d human pose in the wild using imus and a moving camera. In *ECCV*, pages 601–617, 2018. 2
- [28] Zhixuan Yu, Jae Shin Yoon, In Kyu Lee, Prashanth Venkatesh, Jaesik Park, Jihun Yu, and Hyun Soo Park. Humbi: A large multiview dataset of human body expressions. In *CVPR*, pages 2990–3000, 2020. 2
- [29] Weiyu Zhang, Menglong Zhu, and Konstantinos G Derpanis. From actemes to action: A strongly-supervised representation for detailed action understanding. In *Proceedings of the IEEE ICCV*, pages 2248–2255, 2013. 2
- [30] Ziyi Zhao, Sena Kiciroglu, Hugues Vinzant, Yuan Cheng, Isinsu Katircioglu, Mathieu Salzmann, and Pascal Fua. 3d pose based feedback for physical exercises. *arXiv preprint arXiv:2208.03257*, 2022. 2
- [31] Zerong Zheng, Tao Yu, Yixuan Wei, Qionghai Dai, and Yebin Liu. Deephuman: 3d human reconstruction from a single image. In *The IEEE ICCV*, October 2019. 2
